# Supplementary material for: Prognostic significance of FOXP3+ tumor-infiltrating lymphocytes in breast cancer depends on estrogen receptor and human epidermal growth factor receptor-2 expression status and concurrent cytotoxic T-cell infiltration
Source: Springer Nature journal article supplement (doi:10.1186/s13058-014-0432-8), 2014-09-05
Supplement: MOESM2 [file 9781158]

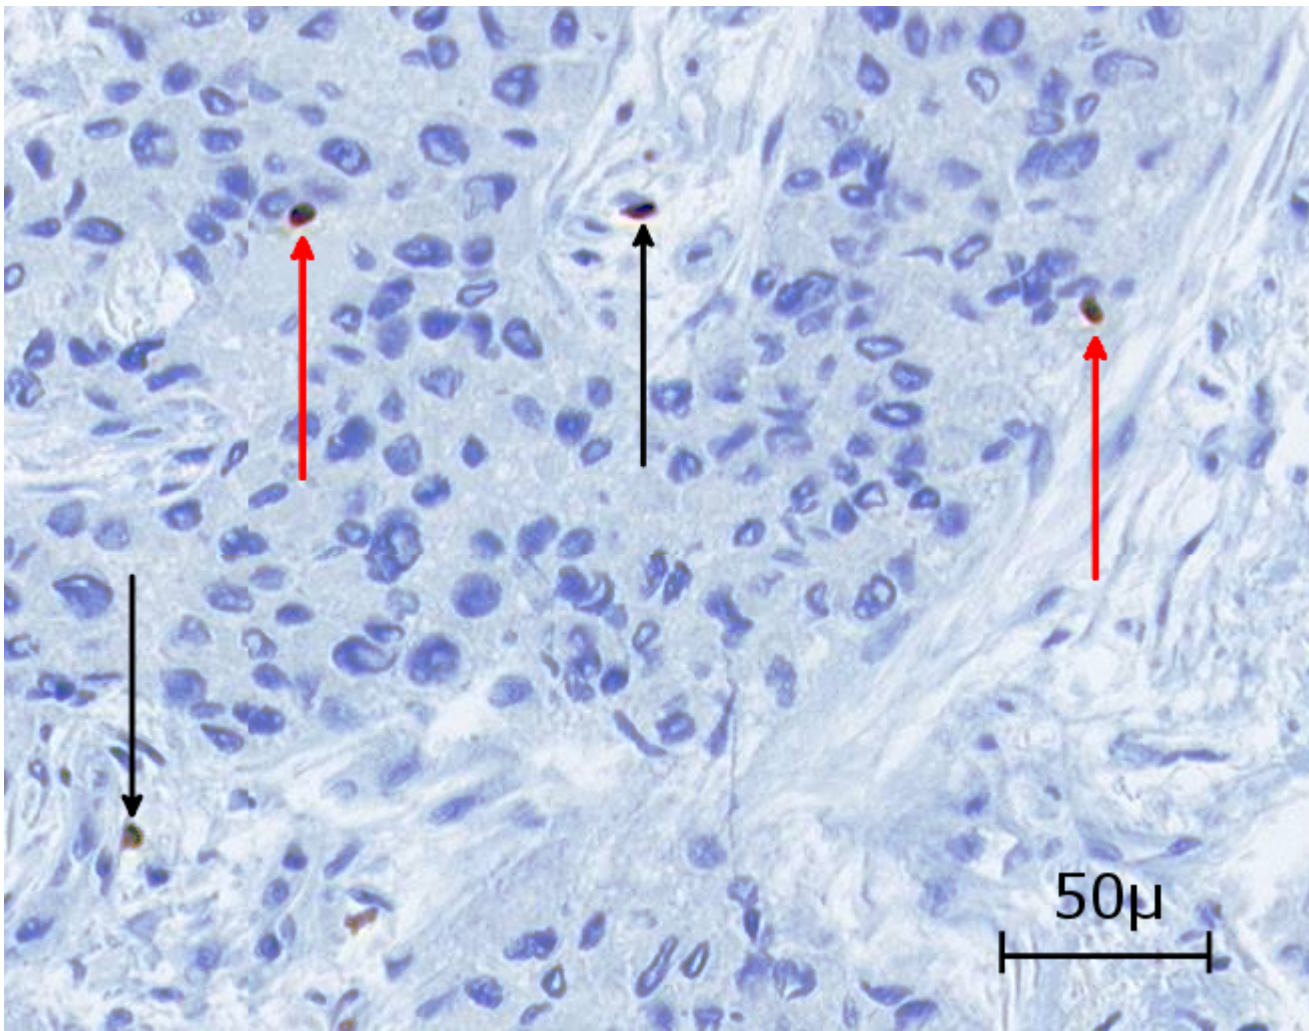

Figure S1. FOXP3+ TILs in breast cancer. Red arrows show examples of FOXP3+ iTIL, and black arrows indicate examples of FOXP3+ sTIL. All of the FOXP3-stained images are available at <http://www.gpecimage.ubc.ca>.
